# Supplementary material
Source: publisher figshare collection journal article supplement (https://acs.figshare.com/ndownloader/files/4762384)
Supplement: Supplementary file 1 [file 4762384]

**Supporting information Available**

|           |                                                                                                                                                                                                            |
|-----------|------------------------------------------------------------------------------------------------------------------------------------------------------------------------------------------------------------|
| S2-3      | General experimental methods                                                                                                                                                                               |
| S4-10     | Methods for synthesizing compounds: <b>3</b> , <b>ent-4</b> , <b>6</b> , <b>ent-6</b> , <b>7</b> , <b>12</b> , <b>13</b> , <b>ent-13</b> , <b>15</b> , <b>ent-15</b> , <b>17</b> , <b>18</b> , <b>19</b> . |
| S11-12    | <sup>1</sup> H nmr spectrum and GC chromatogram for <b>16</b>                                                                                                                                              |
| S13-14a/b | <sup>1</sup> H nmr spectrum and GC chromatogram for <b>4</b>                                                                                                                                               |
| S15-16a/b | <sup>1</sup> H nmr spectrum and GC chromatogram for <b>6</b>                                                                                                                                               |
| S17       | <sup>1</sup> H nmr spectrum for <b>13</b>                                                                                                                                                                  |
| S18-19a/b | <sup>1</sup> H nmr spectrum and GC chromatogram for <b>15</b>                                                                                                                                              |
| S20-21    | <sup>1</sup> H nmr spectrum and GC chromatogram for <b>5</b>                                                                                                                                               |
| S22-23    | <sup>1</sup> H nmr spectrum and GC chromatogram for <b>7</b>                                                                                                                                               |
| S24       | GC chromatogram for <b>9</b>                                                                                                                                                                               |
| S25-26    | <sup>1</sup> H nmr spectrum and GC chromatogram for <b>18</b>                                                                                                                                              |
| S27-28    | <sup>1</sup> H nmr spectrum and GC chromatogram for <b>14</b>                                                                                                                                              |
| S29-30    | <sup>1</sup> H nmr spectrum and GC chromatogram for <b>17</b>                                                                                                                                              |

## General Experimental Methods.

Melting points were determined using a hot-stage melting point apparatus and are uncorrected. Infrared spectra were recorded on a FT-IR spectrophotometer as potassium bromide disks of solids (KBr) or as thin films of liquids (neat) between sodium chloride plates. Nuclear magnetic resonance spectra ( $^1\text{H}$ ,  $^{31}\text{P}$  and  $^{13}\text{C}$  NMR) were recorded on either 300 or 400 MHz spectrometers.  $^1\text{H}$  and  $^{13}\text{C}$  NMR assignments were confirmed using standard 2D COSY, NOESY, HSQC, and HMBC experiments. Low resolution electrospray ionisation (ESI) were recorded in the positive mode ( $\text{ESI}^+$ ) on a QMS-quadrupole mass spectrometer. Accurate mass measurements were obtained at high resolution with a FTMS and a 4.7T superconducting magnet. The instrument was externally calibrated with FC5311. Analytical thin-layer chromatography (TLC) was performed on plastic slides coated with silica gel (Polygram SIL g/uv254). Flash chromatography was performed using Merck silica gel 60 (Merck no. 9385), 0.063-0.200 mm (230-400 mesh). Solvents were purified according to standard procedures. Chloroform used for optical rotations was of analytical purity. Degassed methanol and benzene were used in all hydrogenation reactions. Degassed dichloromethane was used in metathesis reactions. Deuterated chloroform was used as supplied. Deuterated dichloromethane was degassed by three freeze-pump-thaw cycles. Grubbs' catalyst refers to bis(tricyclohexylphosphine)benzylidene ruthenium dichloride.<sup>18</sup> Second generation Grubbs' catalyst refers to tricyclohexylphosphine[1,3-bis(2,4,6-trimethylphenyl)-4,5-dihydroimidazol-2-ylidene][benzylidene]ruthenium dichloride.<sup>19</sup> Wilkinson's catalyst refers to chlorotris(triphenylphosphine)rhodium (I).<sup>23</sup> Rh(I)-(S,S)-Et-DuPHOS refers to (+)-1,2-bis[(2S,5S)-2,5-diethylphospholano]benzene(1,5-cyclooctadiene)rhodium(I) tetrafluoroborate.<sup>20</sup> Rh(I)-(R,R)-Et-DuPHOS refers to (-)-1,2-bis[(2R,5R)-2,5-diethylphospholano]benzene(1,5-cyclooctadiene)rhodium(I) tetrafluoroborate.<sup>20</sup> All ruthenium-catalysed metathesis reactions were performed using standard Schlenk techniques under an atmosphere of nitrogen or in an argon filled drybox. Solvents were dried and degassed using standard procedures. In all rhodium-phosphine hydrogenations, high purity (<10 ppm of

oxygen) hydrogen and argon were used and purified by passage through a series of traps to remove water, oxygen and hydrocarbons. Ethylene and *cis*-2-butene were used as supplied. The enantiomeric excess of hydrogenation products was determined *via* analytical gas chromatography (GC) using a chiral column Model C-024 (column: 0.25 mm x 50 cm, 50CP2/XE60-SVALSAPEA) using helium as the carrier gas. Optical rotations were measured with a polarimeter (in a cell length of 1 dm) at a wavelength of 589 nm (sodium D line) at a temperature of 22°C.

**(2R)-Methyl 2N-acetylaminopent-4-enoate (ent-4).**<sup>16</sup> (2Z)-Methyl 2N-acetylaminopenta-2,4-dienoate **3** (40.0 mg, 0.24 mmol), benzene (5 ml), [(COD)Rh(*R,R*)-Et-DuPHOS]OTf (3 mg), 30 psi H<sub>2</sub>, 3 h, 88% yield, 96% ee (2*R*-**4**), *t*<sub>R</sub> = 16.4 min (*R*) (GC chiral column Model C-024, 100°C for 1 min, 5°C min<sup>-1</sup> to 280°C for 9 min). [ $\alpha$ ]<sub>D</sub><sup>22</sup> -43.0° (c = 0.47, CHCl<sub>3</sub>). Spectral data were consistent with literature data.<sup>16</sup>

**(2S)-Methyl 2N-benzoylaminopent-4-enoate (6).**<sup>32</sup> (2Z)-Methyl 2N-benzoylaminopenta-2,4-dienoate (100.0 mg, 0.43 mmol), benzene (8 ml), [(COD)Rh(*S,S*)-Et-DuPHOS]OTf (3 mg), 30 psi H<sub>2</sub>, 3 h, 99% yield, 100% ee (2*S*-**6**), *t*<sub>R</sub> = 27.0 min (GC chiral column Model C-024, 180°C for 1 min, 2°C min<sup>-1</sup> to 210°C for 20 min). [ $\alpha$ ]<sub>D</sub><sup>22</sup> +49.3° (c = 1.12, CHCl<sub>3</sub>). Spectral data were consistent with literature data.<sup>32</sup>

**(2R)-Methyl 2N-benzoylaminopent-4-enoate (ent-6).**<sup>32</sup> (2Z)-Methyl 2N-benzoylaminopenta-2,4-dienoate (100.0 mg, 0.43 mmol), benzene (8 ml), [(COD)Rh(*R,R*)-Et-DuPHOS]OTf (3 mg), 30 psi H<sub>2</sub>, 3 h, 93% yield, 100% ee (2*R*-**6**), *t*<sub>R</sub> = 26.4 min (GC chiral column Model C-024, 180°C for 1 min, 2°C min<sup>-1</sup> to 210°C for 20 min). [ $\alpha$ ]<sub>D</sub><sup>22</sup> -49.7° (c = 0.64, CHCl<sub>3</sub>). Spectral data were consistent with literature data.<sup>32</sup>

**(2S)-Methyl 2N-acetyl-amino-5-phenylpent-4-enoate (13).**<sup>30</sup> (2Z)-Methyl 2N-acetyl-amino-5-phenylpenta-2,4-dienoate **12** (28.0 mg, 0.11 mmol), methanol (5 ml), [(COD)Rh(*S,S*)-Et-DuPHOS]OTf (1 mg), 75 psi H<sub>2</sub>, 2 h, 97% yield, 99% ee (2*S*-**13**). [ $\alpha$ ]<sub>D</sub><sup>22</sup> +90.0° (c = 0.64, CHCl<sub>3</sub>). Spectral data were consistent with literature data.<sup>30</sup>

**(2R)-Methyl 2N-acetylamino-5-phenylpent-4-enoate (ent-13).**<sup>30</sup> (2Z)-Methyl 2N-acetylamino-5-phenylpenta-2,4-dienoate **12** (27.4 mg, 0.11 mmol), methanol (5 ml), [(COD)Rh(*R,R*)-Et-DuPHOS]OTf (1 mg), 75 psi H<sub>2</sub>, 2 h, 92% yield, 99% ee (**2R-13**).  $[\alpha]_D^{22} -89.8^\circ$  (*c* = 1.03, CHCl<sub>3</sub>). Spectral data were consistent with literature data.<sup>30</sup>

**(2S)-Methyl 2N-acetylamino-5-methylhex-4-enoate (15).** (2Z)-Methyl 2N-acetylamino-5-methylhexa-2,4-dienoate **16** (74.0 mg, 0.38 mmol), methanol (5 ml), [(COD)Rh(*S,S*)-Et-DuPHOS]OTf (2 mg), 75 psi H<sub>2</sub>, 2 h, 98% yield, 100% ee (**2S-15**), *t<sub>R</sub>* = 24.2 min (GC chiral column Model C-024, 100°C for 1 min, 5°C min<sup>-1</sup> to 210°C for 7 min).  $[\alpha]_D^{22} +58.2^\circ$  (*c* = 0.79, CHCl<sub>3</sub>), m.p. 46-48°C.  $\nu_{\max}$  (neat): 3288m, 2955w, 1746s, 1660s, 1538m, 1436m, 1377m, 1274w, 1210w, 1126w, 1030w, 736w cm<sup>-1</sup>. <sup>1</sup>H NMR (300 MHz, CDCl<sub>3</sub>):  $\delta$  1.59 (s, 3H, H6a), 1.69 (d, *J* 0.9 Hz, 3H, H6b), 2.00 (s, 3H, CH<sub>3</sub>CO), 2.39-2.60 (m, 2H, H3), 3.72 (s, 3H, OCH<sub>3</sub>), 4.63 (dt, *J* 7.9, 5.6 Hz, 1H, H2), 4.99 (t, *J* 7.5 Hz, 1H, H4), 6.02 (bs, 1H, NH). <sup>13</sup>C NMR. (100 MHz, CDCl<sub>3</sub>):  $\delta$  18.0, 26.0, ((CH<sub>3</sub>)<sub>2</sub>), 23.3 (CH<sub>3</sub>CO), 30.8 (C3), 52.2, 52.4 (C2, OCH<sub>3</sub>), 117.6 (C4), 136.6 (C5), 169.8, 172.8 (C1, CONH). HRMS (ESI<sup>+</sup>, MeOH): *m/z* calcd for C<sub>10</sub>H<sub>17</sub>NO<sub>3</sub>Na [(M+Na)<sup>+</sup>] 222.1106, found 222.1105.

**(2R)-Methyl 2N-acetylamino-5-methylhex-4-enoate (ent-15).** (2Z)-Methyl 2N-acetylamino-5-methylhexa-2,4-dienoate **16** (24.5 mg, 0.12 mmol), methanol (5 ml), [(COD)Rh(*R,R*)-Et-DuPHOS]OTf (1 mg), 75 psi H<sub>2</sub>, 2 h, 100% yield, 100% ee (**2R-15**), *t<sub>R</sub>* = 23.9 min (GC chiral column Model C-024, 100°C for 1 min, 5°C min<sup>-1</sup> to 210°C for 7 min).  $[\alpha]_D^{22} -58.3^\circ$  (*c* = 0.53, CHCl<sub>3</sub>). Spectral data were consistent with that previously obtained.

**(2S,7S)-Dimethyl 2,7-*N,N'*-dibenzoylamino-oct-4-enedioate (7).** (2S)-Methyl 2N-benzoylaminopent-4-enoate **6** (49.0 mg, 0.21 mmol), dichloromethane (4 ml), 2<sup>nd</sup> generation Grubbs' **S5**

catalyst (18.0 mg, 0.02 mmol, 10 mol%), 12 h, 50°C, 100% conversion. Purification by flash chromatography (SiO<sub>2</sub>, dichloromethane : light petroleum : ethyl acetate, 1:1:1) gave pure dimer **7** (32.8 mg, 36%) as a pale brown solid, m.p. 140-142°C.  $t_R$  (*E/Z*) = 13.5, 13.9 min (GC column 30QC5/BPX5), 150°C for 1 min, 10°C min<sup>-1</sup> to 280°C for 6 min).  $[\alpha]_D^{22} +56.4^\circ$  (*c* = 0.27, CHCl<sub>3</sub>).  $\nu_{max}$  (neat): 3322bm, 2953m, 2358w, 1742s, 1644s, 1603w, 1580w, 1538m, 1488m, 1436m, 1267w, 1218m, 1027w, 973w, 802w, 736m cm<sup>-1</sup>. <sup>1</sup>H NMR (300 MHz, CDCl<sub>3</sub>):  $\delta$  2.57-2.69 (m, 4H, H3,6), 3.67 (s, 6H, OCH<sub>3</sub>), 4.85-4.98 (m, 2H, H2,7), 5.49 (t, *J* 4.1 Hz, 2H, H4,5), 6.86 (bd, *J* 7.4 Hz, 2H, NH), 7.40-7.44 (m, 4H, H3',5'), 7.48-7.52 (m, 2H, H4'), 7.81-7.83 (m, 4H, H2',6'). <sup>13</sup>C NMR (100 MHz, CDCl<sub>3</sub>):  $\delta$  35.2 (C3,6), 52.5 (C2,7), 52.6 (OCH<sub>3</sub>), 127.2 (C2',6'), 128.7 (C3',5'), 128.8 (C4,5), 131.9 (C4'), 133.9 (C1'), 167.1, 172.4 (C1,8, CONH). HRMS (ESI<sup>+</sup>, MeOH): *m/z* calcd for C<sub>24</sub>H<sub>26</sub>N<sub>2</sub>O<sub>6</sub>Na [(M+Na)<sup>+</sup>] 461.1689, found 461.1695.

**Attempted dimerisation of (2*S*)-methyl 2*N*-acetylamino-5-phenylpent-4-enoate (**13**).** *Trial 1:* (2*S*)-Methyl 2*N*-acetylamino-5-phenylpent-4-enoate **13** (59.3 mg, 0.24 mmol), dichloromethane (10 ml), Grubbs' catalyst (19.8 mg, 0.02 mmol, 10 mol%), 13 h, 50°C, 0% conversion of **13** into dimer **5**. *Trial 2:* (2*S*)-Methyl 2*N*-acetylamino-5-phenylpent-4-enoate **13** (59.3 mg, 0.24 mmol), dichloromethane (7 ml), 2<sup>nd</sup> generation Grubbs' catalyst (10.2 mg, 0.01 mmol, 5 mol%), 20 h, 50°C, 33% conversion of **13** into dimer **5**.

**Dimerisation of (2*S*)-Methyl 2*N*-acetylaminohex-4-enoate (**17**).** (2*S*)-Methyl 2*N*-acetylaminohex-4-enoate **17** (17.0 mg, 0.09 mmol), dichloromethane (4 ml), 2<sup>nd</sup> generation Grubbs' catalyst (4.2 mg, 0.005 mmol, 5 mol%), 17 h, 50°C, 100% conversion into dimer **5**. Spectroscopic data were in agreement with that previously obtained.

**Cross metathesis of (2*S*)-methyl 2*N*-acetylaminopent-4-enoate (**4**) in the presence of (2*S*)-methyl 2*N*-acetylaminopenta-2,4-dienoate (**3**).** (2*S*)-Methyl 2*N*-acetylaminopent-4-enoate **4** (34.0 mg, 0.20 mmol), (2*Z*)-methyl 2*N*-acetylaminopenta-2,4-dienoate **3** (33.6 mg, 0.20 mmol), dichloromethane (4 ml), Grubbs' catalyst (16.3 mg, 0.02 mmol, 10 mol%), 18 h, 50°C. The <sup>1</sup>H NMR spectrum displayed peaks characteristic of the starting allylglycine derivative **4** and dienamide **3** but no peaks characteristic of expected dimer **5**. The mass spectrum displayed peaks attributed to allylglycine derivative **4** and tricyclohexylphosphine-dienamide conjugate addition adduct. Mass Spectrum (ESI<sup>+</sup>, DCM/MeOH): *m/z* 194.1 C<sub>8</sub>H<sub>13</sub>NO<sub>3</sub>Na [(M+Na)<sup>+</sup>], **4**. *m/z* 450.4 C<sub>26</sub>H<sub>45</sub>NO<sub>3</sub>P<sup>+</sup> [M<sup>+</sup>], tricyclohexylphosphine-dienamide adduct.

**Cross metathesis of (2*S*)-methyl 2*N*-acetylaminopent-4-enoate (**4**) in the presence of (2*S*)-methyl 2*N*-acetylaminopenta-2,4-dienoate (**12**).** (2*S*)-Methyl 2*N*-acetylaminopent-4-enoate **4** (18.1 mg, 0.11 mmol), (2*Z*)-methyl 2*N*-acetylaminopenta-2,4-dienoate **12** (26.1 mg, 0.11 mmol), dichloromethane (4 ml), Grubbs' catalyst (8.7 mg, 0.01 mmol, 10 mol%), 18 h, 50°C, 28% conversion of **4** into dimer **5**. Dienamide **12** did not react under these conditions.

**Cross metathesis of (2*S*)-Methyl 2*N*-acetylaminopent-4-enoate (**4**) in the presence of (2*S*)-Methyl 2*N*-acetylaminopenta-2,4-dienoate (**15**).** (2*S*)-Methyl 2*N*-acetylaminopent-4-enoate **4** (12.7 mg, 0.07 mmol), (2*S*)-methyl 2*N*-acetylaminopenta-2,4-dienoate **15** (12.0 mg, 0.07 mmol), dichloromethane (4 ml), Grubbs' catalyst (11.5 mg, 0.01 mmol, 20 mol%), 18 h, 50°C, 100% conversion of **4** into dimer **5**. **15** did not react under these conditions.

**Wilkinson's hydrogenation of Dimer (7).** (2*S*,7*S*)-Dimethyl 2,7-*N,N'*-dibenzoylamino-octanedioate (**18**). (2*S*,7*S*)-Dimethyl 2,7-*N,N'*-dibenzoylamino-octa-4-enedioate **7** (20.0 mg, 0.05

mmol), benzene (5 ml), Wilkinson's catalyst (2 mg), 50 psi H<sub>2</sub>, 4 h, 100% of **18** as a brown oil.  $t_R = 17.2$  min (GC: Column 30QC5/BPX5, 150°C for 1 min, 10°C min<sup>-1</sup> to 280°C for 6 min).  $\nu_{\max}$  (neat): 3055m, 2986w, 2955w, 1741s, 1662s, 1603w, 1580w, 1518m, 1486m, 1438s, 1359w, 1286s, 1182m, 1120m, 1028w, 896m cm<sup>-1</sup>. <sup>1</sup>H NMR (300 MHz, CDCl<sub>3</sub>):  $\delta$  1.35-1.53 (m, 4H, H4,5), 1.80-2.02 (m, 4H, H3,6), 3.78 (s, 3H, OCH<sub>3</sub>), 4.82 (dt,  $J$  7.4, 5.3 Hz, 1H, H2,7), 6.73 (bd,  $J$  7.7 Hz, 2H, NH), 7.40-7.49 (m, 6H, H3',4',5'), 7.78-7.82 (m, 4H, H3',5'). <sup>13</sup>C NMR (100 MHz, CDCl<sub>3</sub>):  $\delta$  24.9 (C4,5), 32.6 (C3,6), 52.5, 52.7 (C2, OCH<sub>3</sub>), 127.2 (C2',6'), 128.6 (C3',5'), 131.9 (C4'), 134.1 (C1'), 167.2, 173.2 (C1,8, CONH). HRMS (ESI<sup>+</sup>, MeOH):  $m/z$  calcd for C<sub>24</sub>H<sub>28</sub>N<sub>2</sub>O<sub>6</sub>Na [(M+Na)<sup>+</sup>] 463.1845, found: 463.1842

**Wilkinson's hydrogenation of (2S)-methyl 2N-acetylamino-5-phenylpenta-2,4-dienoate (12).**

(2S)-Methyl 2N-acetylamino-5-phenylpenta-2,4-dienoate **12** (11.5 mg, 0.05 mmol), benzene (5 ml), Wilkinson's catalyst (1 mg), 50 psi H<sub>2</sub>, 4 h, 99% yield of a 1:4 mixture of 13:14 as a brown oil. This mixture was subjected to the hydrogenation conditions previously described which led to 100% conversion into **14**.<sup>34</sup>.  $t_R = 10.8$  min (GC column 30QC5/BPX5, 150°C for 1 min, 10°C min<sup>-1</sup> to 280°C for 6 min).  $\nu_{\max}$  (neat): 3054m, 2956m, 1736m, 1676m, 1509w, 1438m, 1372w, 1265s, 1174w, 1120m, 1028w, 738s cm<sup>-1</sup>. <sup>1</sup>H NMR (300 MHz, CDCl<sub>3</sub>):  $\delta$  1.53-1.65 (m, 4H, H3,4), 1.94 (s, 3H, CH<sub>3</sub>CO), 2.52-2.59 (m, 2H, H5), 3.65 (s, 3H, OCH<sub>3</sub>), 4.54-4.63 (m, 1H, H2), 5.90 (bd,  $J$  7.2 Hz, 1H, NH), 7.07-7.29 (m, 5H, AromCH). <sup>13</sup>C NMR (75 MHz, CDCl<sub>3</sub>):  $\delta$  23.3 (CH<sub>3</sub>CO), 27.2 (C4), 32.3 (C3), 35.5 (C5), 52.1, 52.5 (C2, OCH<sub>3</sub>), 126.1, 128.5, 132.2 (Arom CH), 141.7, (Arom C), 169.9, 173.2 (C1, CONH). Mass Spectrum (ESI<sup>+</sup>, MeOH):  $m/z$  272.2 C<sub>14</sub>H<sub>19</sub>NO<sub>3</sub>Na [(M+Na)<sup>+</sup>].



## Linear Pentapeptide: Fmoc-Hag-Pro-Pre-Arg-Hag-OH

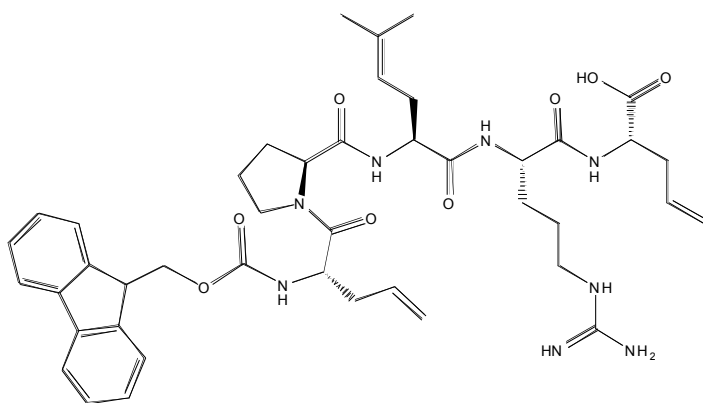

19

The procedure outlined in the General Section was used to attach the first amino acid, Fmoc-Hag-OH, to Wang resin. Quantities of the resin and coupling reagents are presented in Table 1. The first coupling reaction was shaken for 14 h.

**Table 1 Quantities of Reagents used in the Synthesis of Fmoc-Hag-Pro-Pre-Arg-Hag-OH**

| <i>Reagent</i> | <i>Mass (mg) or Volume (μl)</i> | <i>Mole (mmol)</i> |
|----------------|---------------------------------|--------------------|
| Wang Resin     | 212 mg                          | 0.19               |
| Fmoc-L-Hag-OH  | 195 mg                          | 0.58               |
| DIC            | 90.6 μl                         | 0.58               |
| DMAP           | 7.1 mg                          | 0.06               |

The procedure outlined in the General Section was used for subsequent coupling reactions in the synthesis of pentapeptide Fmoc-Hag-Pro-Pre-Arg-Hag-OH. Quantities of the coupling reagents HATU and NMM are tabulated below (Table 2) and remained constant throughout the synthesis. The quantities of successive amino acids and their reaction durations are detailed in Table 3.

**Table 2 Quantities of Coupling Reagents used in the Synthesis of Fmoc-Hag-Pro-Pre-Arg-Hag-OH**

| <i>Coupling Reagent</i> | <i>Mass (mg) or Volume (ml)</i> | <i>Mole (mmol)</i> |
|-------------------------|---------------------------------|--------------------|
| HATU                    | 147 mg                          | 0.39               |
| NMM                     | 128 $\mu$ l                     | 1.16               |

**Table 3 Quantities of Amino Acids used in the Synthesis of Fmoc-Hag-Pro-Pre-Arg-Hag-OH**

| <i>Amino Acid</i>  | <i>Mass (mg)</i> | <i>Mole (mmol)</i> | <i>Reaction Time (h)*</i> |
|--------------------|------------------|--------------------|---------------------------|
| Fmoc-L-Arg(Pbf)-OH | 376              | 0.58               | 2                         |
| Fmoc-L-Pre-OH      | 211              | 0.58               | 3                         |
| Fmoc-L-Pro-OH      | 196              | 0.58               | 6                         |
| Fmoc-L-Hag-OH      | 195              | 0.58               | 2                         |

\* *Note:* Reaction times have not been optimised.

After the final amino acid coupling, a small aliquot of peptidyl-resin was subjected to the TFA-mediated cleavage procedure described in the General Section. Mass spectral analysis of the isolated residue confirmed formation of the linear pentapeptide (**19**). Mass spectrum (ESI<sup>+</sup>, MeCN/H<sub>2</sub>O):  $m/z$  813.6 (M+H)<sup>+</sup>, C<sub>43</sub>H<sub>57</sub>N<sub>8</sub>O<sub>8</sub>.requires 813.4;  $m/z$  831.5 (M+H<sub>2</sub>O+H)<sup>+</sup>, C<sub>43</sub>H<sub>59</sub>N<sub>8</sub>O<sub>9</sub> requires 831.4;  $m/z$  927.6 (M+TFA+H)<sup>+</sup>, C<sub>45</sub>H<sub>58</sub> F<sub>3</sub>N<sub>8</sub>O<sub>10</sub> requires 927.4.

Compound 16

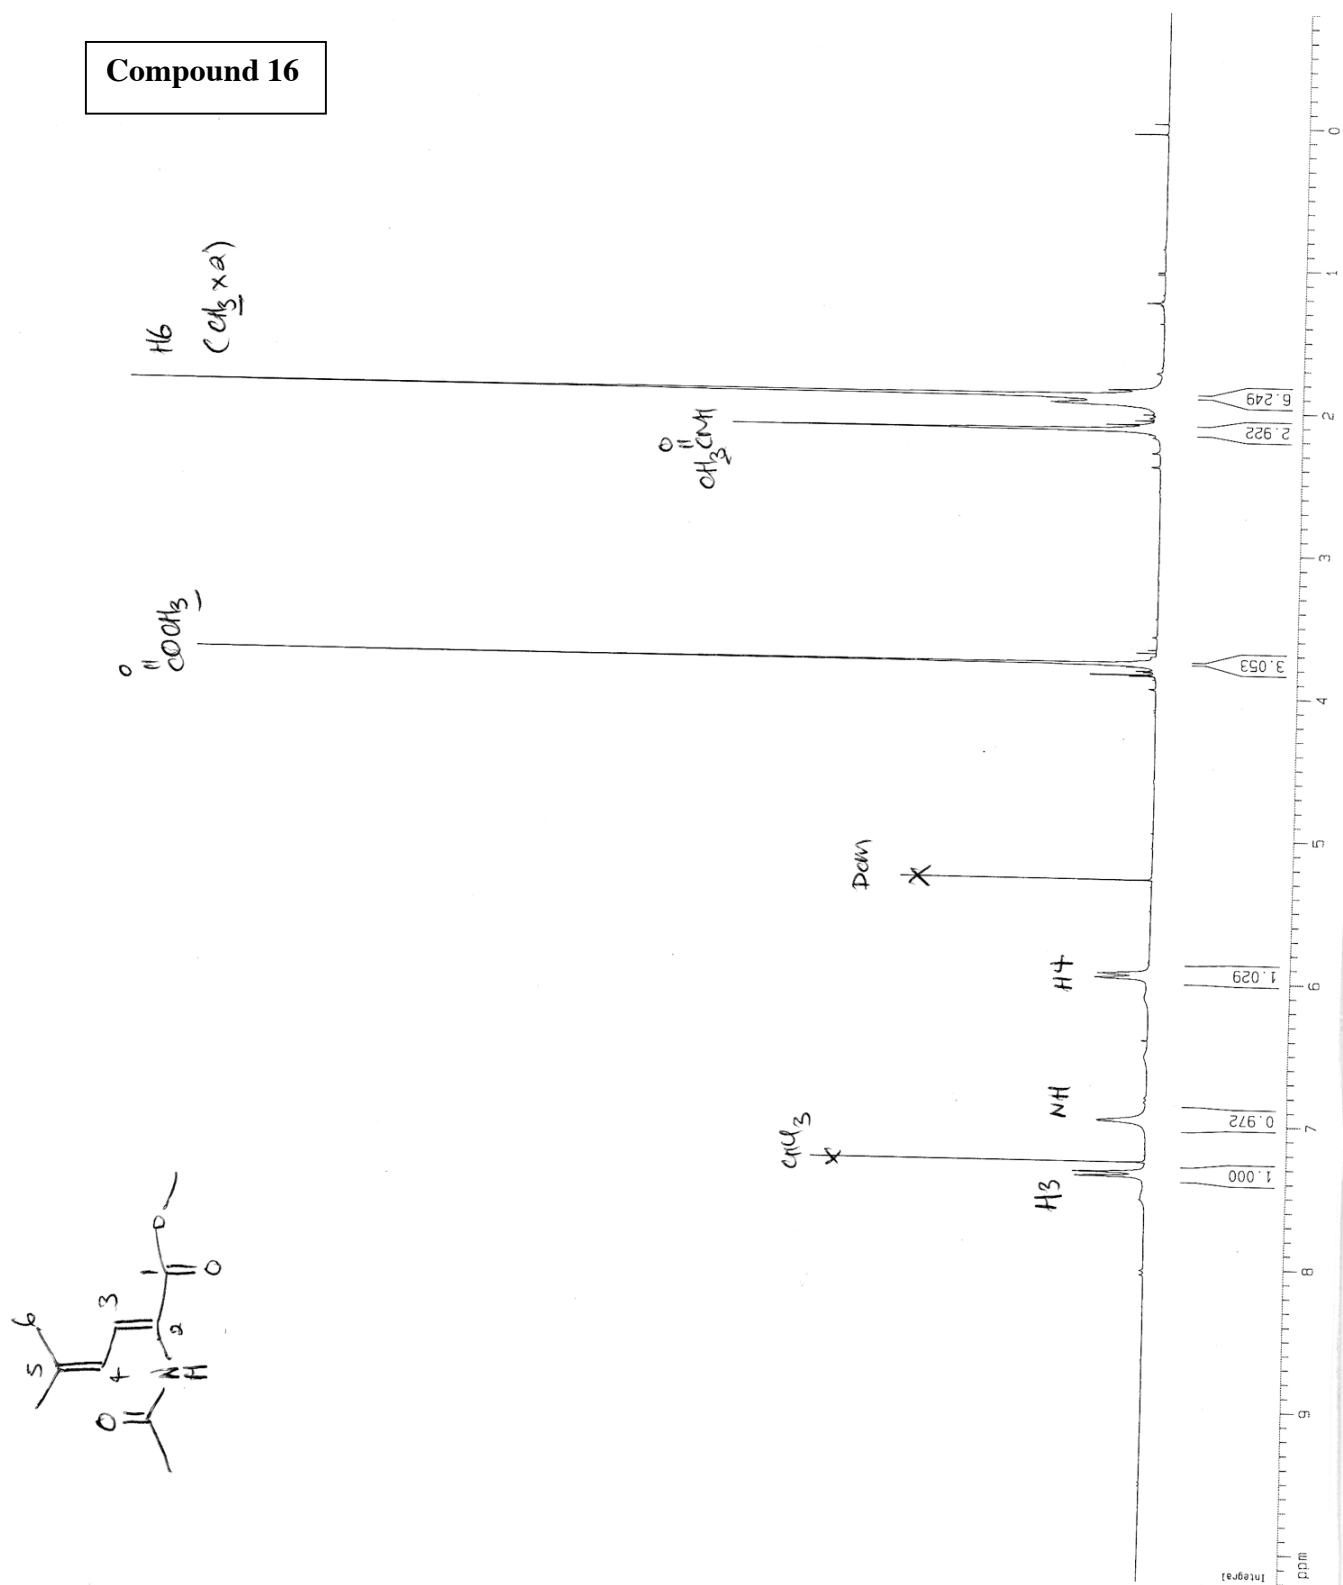

## Compound 16

AREA%  
RT AREA TYPE WIDTH AREA%  
6.306 232517 88 .091 100.00000  
TOTAL AREA=232517  
MULT FACTOR=1.0000E+00

300CS/BPX-5 1.0um

SIGNAL FILE: H:JPT00.BNA

RUN# 100 RUN 11, 1904 11:14:14

Closing signal file H:JPT00 .BNA

Searching for sample info (ESC to abort)

STOP

6.306

IF

START

RUN # 100 RUN 11, 1904 11:14:14

#RN H:JPT00.BNC

\*

\* THRESH 10 0

280°C (6 min)  
150°C 10°C/min  
min

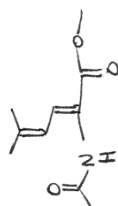

JE-6-101-1300



Data File Name : A:\JE87.D  
 Operator :  
 Instrument :  
 Sample Name : HP5890A  
 Run Time Bar Code :  
 Acquired on : NOV 15, 1904 14:34:20  
 Report Created on: 15 Nov 04 06:09 PM

Page Number : 1  
 Vial Number : 0  
 Injection Number :  
 Sequence Line :  
 Instrument Method : LC1.MTH  
 Analysis Method : LC1.MTH

### Compound 4

16.416

16.605

#### Area Percent Report

Data File Name : A:\JE87.D  
 Operator :  
 Instrument : HP5890A  
 Sample Name :  
 Run Time Bar Code :  
 Acquired on : NOV 15, 1904 14:34:20  
 Report Created on: 15 Nov 04 06:09 PM  
 Page Number : 1  
 Vial Number : 0  
 Injection Number :  
 Sequence Line :  
 Instrument Method :  
 Analysis Method : LC1.MTH

Sig. 1 in A:\JE87.D

| Pk# | Ret Time | Area         | Height  | Type | Width | Area %  |
|-----|----------|--------------|---------|------|-------|---------|
| 1   | 16.416   | 1.07134E+007 | 1758255 | BV   | 0.077 | 97.7503 |
| 2   | 16.605   | 246570       | 85870   | VBA  | 0.043 | 2.2497  |

Total area = 1.096E+007

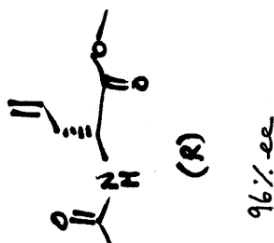

2.0e6  
 1.8e6  
 1.6e6  
 1.4e6  
 1.2e6  
 1.0e6  
 8.0e5  
 6.0e5  
 4.0e5  
 2.0e5  
 0

Data File Name : A:\JE89.D  
 Operator :  
 Instrument : HP5890A  
 Sample Name :  
 Run Time Bar Code :  
 Acquired on : NOV 15, 1904 16:58:33  
 Report Created on: 15 Nov 04 06:13 PM  
 Analysis Method : LC1.MTH  
 Page Number : 1  
 Vial Number : 0  
 Injection Number :  
 Sequence Line :  
 Instrument Method:  
 Analysis Method : LC1.MTH

# Area Percent Report

Data File Name : A:\JE89.D  
 Operator :  
 Instrument : HP5890A  
 Sample Name :  
 Run Time Bar Code:  
 Acquired on : NOV 15, 1904 16:58:33  
 Report Created on: 15 Nov 04 06:13 PM  
 Page Number : 1  
 Vial Number : 0  
 Injection Number :  
 Sequence Line :  
 Instrument Method:  
 Analysis Method : LC1.MTH

Sig. 1 in A:\JE89.D

| Pk# | Ret Time | Area    | Height | Type | Width | Area %  |
|-----|----------|---------|--------|------|-------|---------|
| 1   | 16.213   | 22578   | 6514   | BB   | 0.051 | 1.3715  |
| 2   | 16.533   | 1623691 | 536841 | BBA  | 0.047 | 98.6285 |

Total area = 1646270

## Compound 4

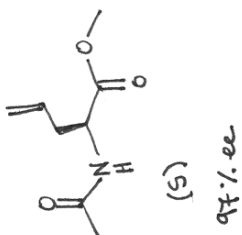

min

8.0e5

7.0e5

6.0e5

5.0e5

4.0e5

3.0e5

2.0e5

1.0e5

0

5

10

15

20

25

## Compound 6

IE-6-54  
 -54  
 xpl stdln  
 e Sequence: s2pul  
 SAMPLE  
 late Mar 22 2004 dfrq 300.059  
 solvent CDC13 dn H1  
 file ACQUISITION exp 30  
 :frq 300.059 dm nnn  
 :n 4.000 dm C  
 :w 36036 wtfile 200  
 :b 4504.5 not used  
 :s 1 not used  
 :pw 62 werr  
 :l 0 wexp  
 :of 0 wbs  
 :t 32 wnt  
 :t 17  
 :t lock  
 :gain not used  
 :n  
 :l n  
 :p n  
 :p y  
 :p  
 :p -353.0  
 :p 3412.2  
 :s 200  
 :c 0  
 :c 250  
 :zmm 13.65  
 :ls 2490.66  
 :fl 803.4  
 :fp 0  
 :h 20  
 :ins 1.000  
 nm cdc ph

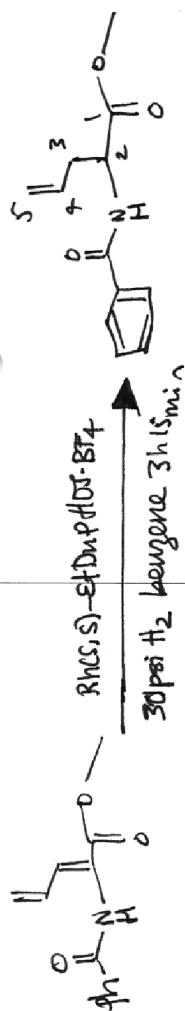

100% conversion

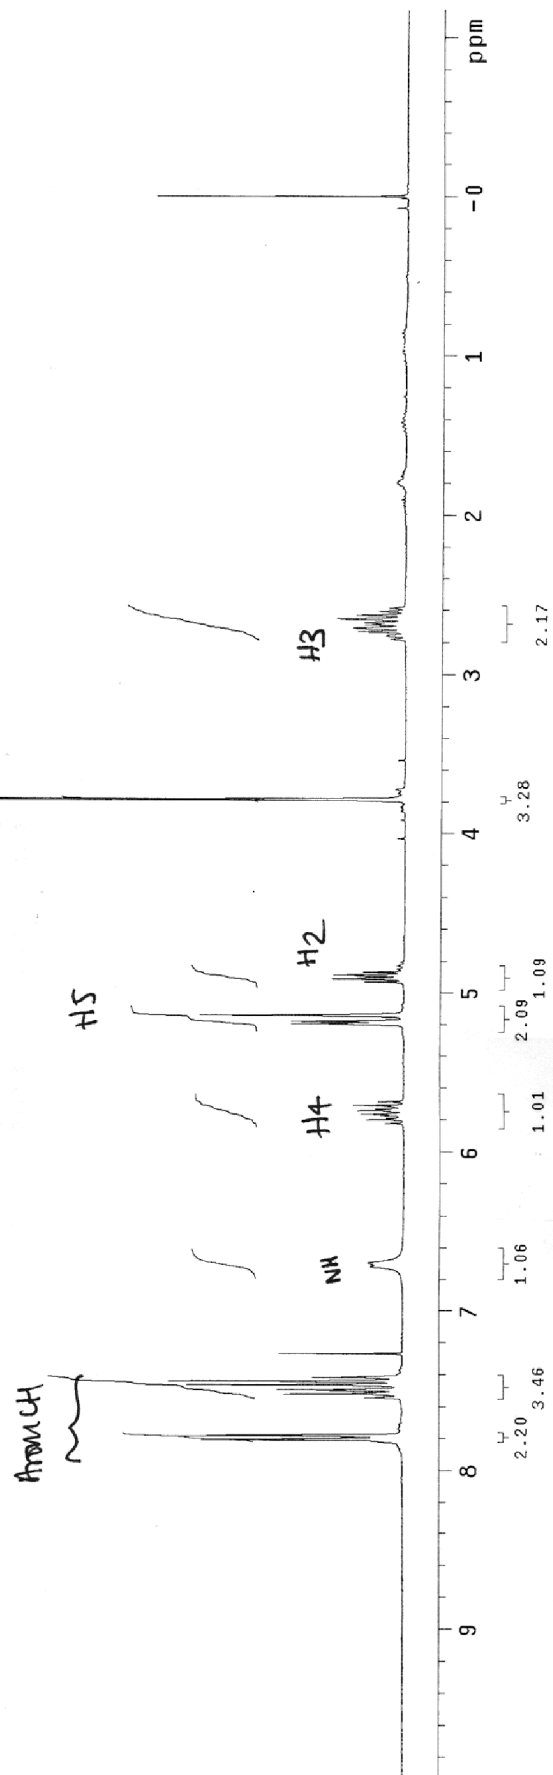



## Compound 6

JE-6-146

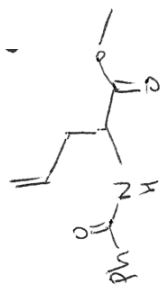From Rh(R,R)-DuPHOS- $\text{BF}_4$ 

210°C (20 min)

180°C

1 min

DCM (solvent)

JE-69b.

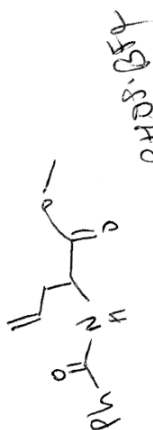

From  $(S, S)$  to  $(S, S)$

$$\frac{1800}{200 \text{ min}^{-1}} = 9 \text{ min}$$

DCM (solvent)

10

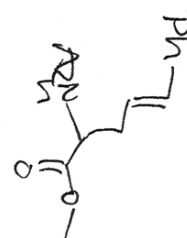**Compound 13**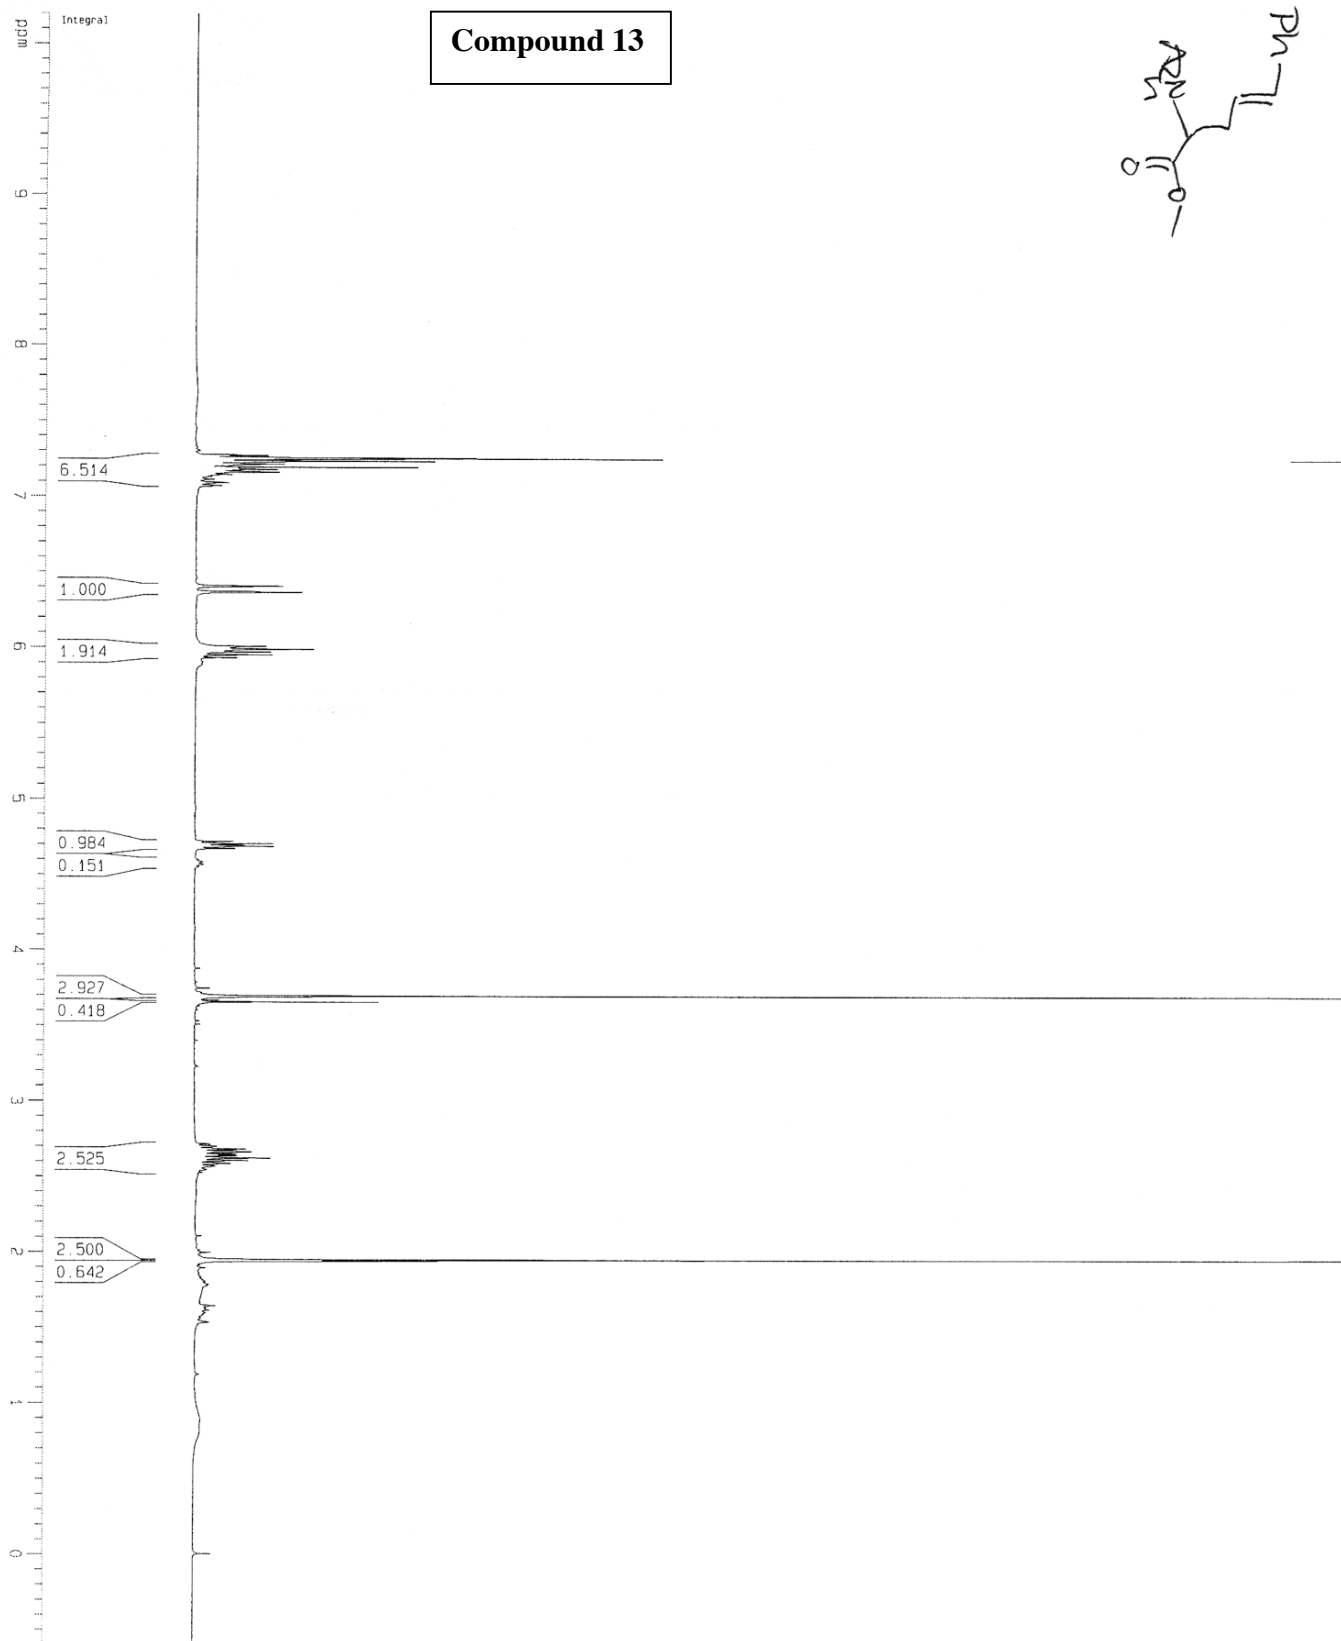

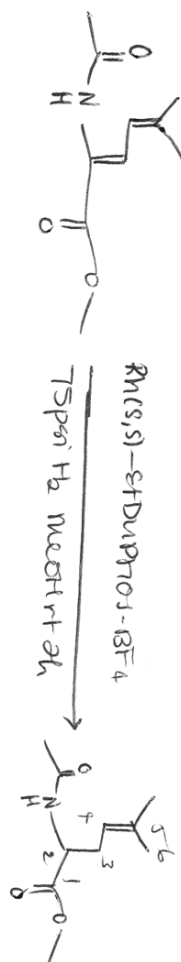

100% conversion (no dimer).

# Compound 15

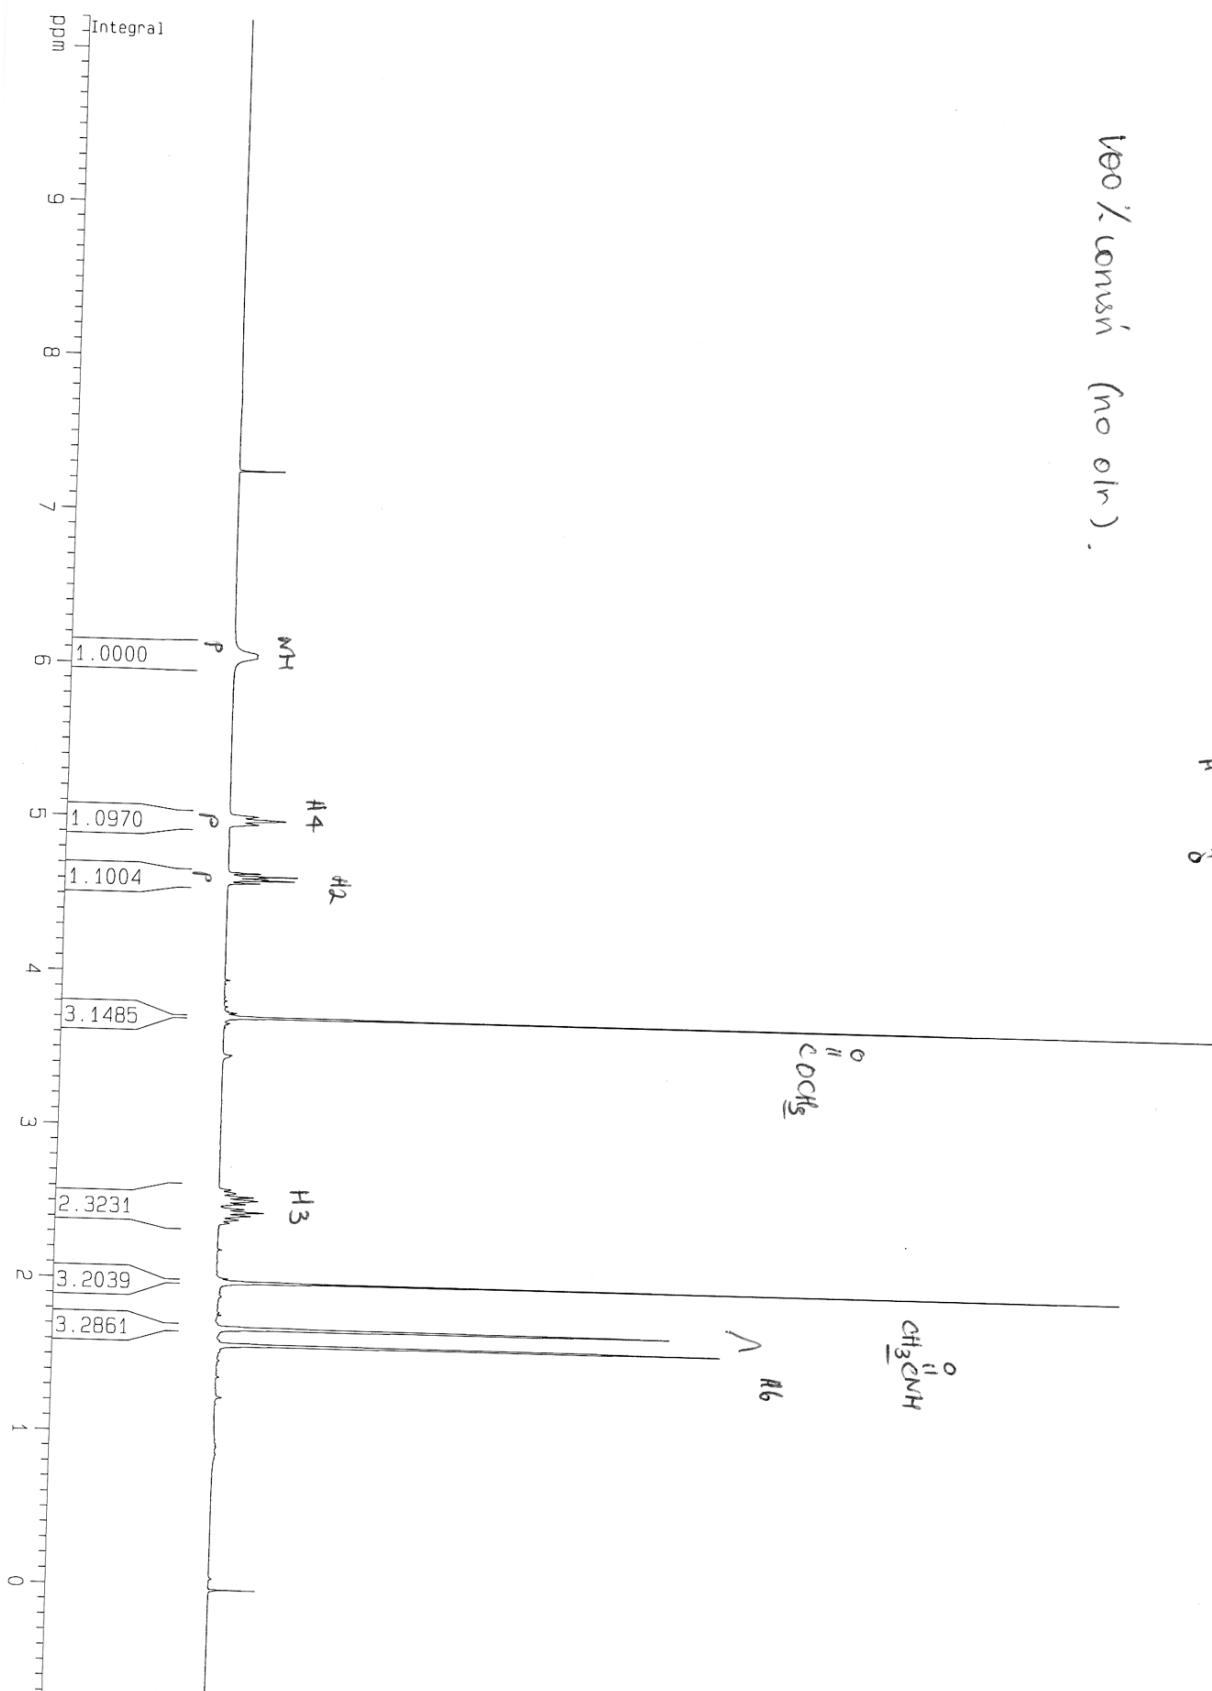

## Compound 15

JE-6-133B Rh(S,S)-EtDUPHOS · BF<sub>4</sub> 24.2100°C  
1 hr  
210°C (7 min)  
5°C/min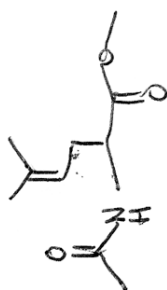

100% ee

100% ee

## Compound 15

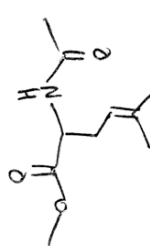

160°C 50 min  
1 min  
200°C (1 min)

JE-6-135B  
(2R,3R)-2-((2S,3S)-3-methyl-2-penten-3-yl)-3-methylbutanamide

23.9

TIMEABLE STOP

C16=100 0.00001 0.010 H-003660004.END

RUN# 00 MAY 27, 1984 10:26:11

SIGNAL FILE: H-003660004.END

AREA

| RT     | AREA   | TYPE | WIDTH | AREA   |
|--------|--------|------|-------|--------|
| 4.483  | 7120   | FB   | .000  | .00000 |
| 4.000  | 145000 | FB   | .000  | .00000 |
| 20.077 | 600000 | FB   | .044  | .04400 |

TOTAL AREA=1.17600E+00

MUL FACTOR=1.00000E+00

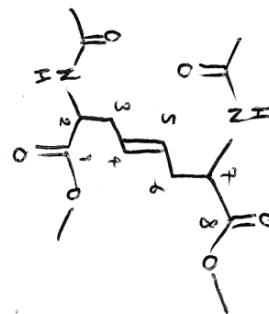

pure product!

Compound 5

JE-6-73-F7+8

Integral

ppm

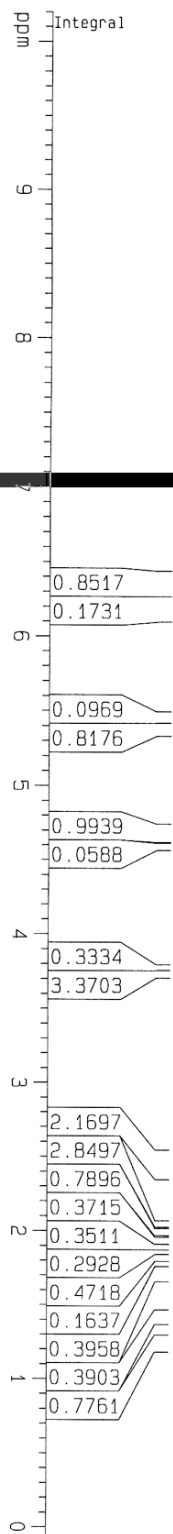

$\text{COCH}_3$

$\text{CH}_3\text{C(=O)NH}$

H<sub>3,6</sub>

H<sub>4,5</sub>

H<sub>2,7</sub>

NH

**Compound 5**
**Area Percent Report**

Data File Name : C:\HPCHEM\1\DATA\JE7.D  
 Operator :  
 Instrument : HP5890A  
 Sample Name :  
 Run Time Bar Code:  
 Acquired on : NOV 14, 1904 23:02:42  
 Report Created on: 15 Nov 04 00:36 AM

Page Number : 1  
 Vial Number : 0  
 Injection Number :  
 Sequence Line :  
 Instrument Method:  
 Analysis Method : GC1.MTH

Sig. 1 in C:\HPCHEM\1\DATA\JE7.D

| Pk# | Ret Time | Area   | Height | Type | Width | Area %  |
|-----|----------|--------|--------|------|-------|---------|
| 1   | 12.483   | 322864 | 109482 | BV   | 0.044 | 67.1459 |
| 2   | 12.676   | 157975 | 45524  | VB   | 0.049 | 32.8541 |

Ac-Hag-divine

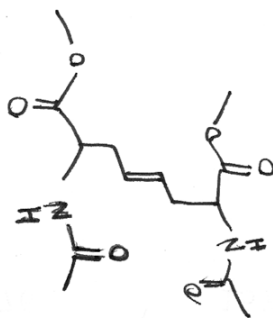

2.0e5

1.8e5

1.6e5

1.4e5

1.2e5

1.0e5

8.0e4

6.0e4

4.0e4

2.0e4



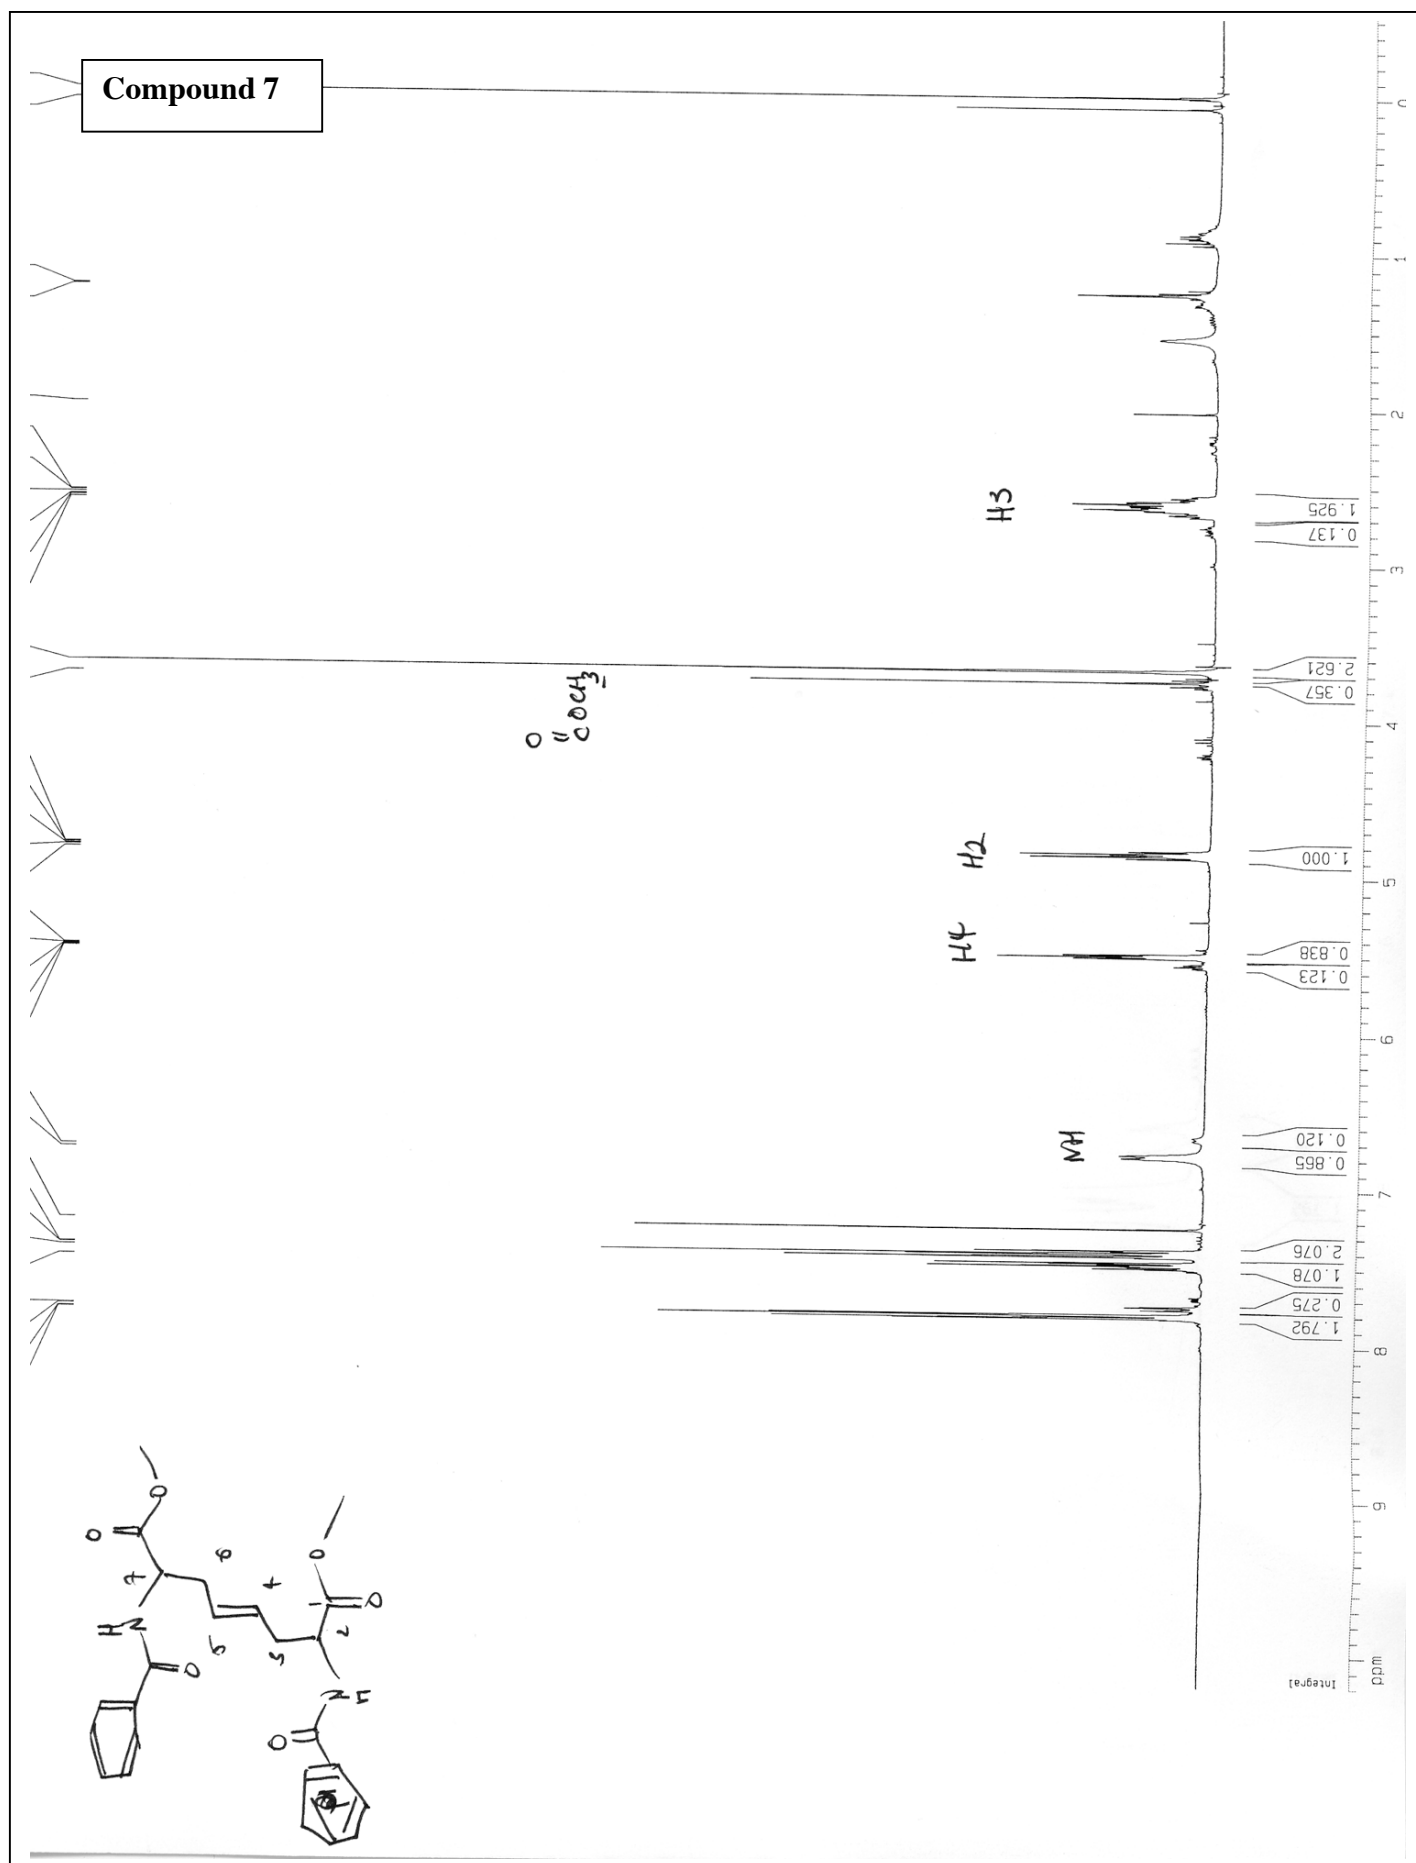

## Compound 7

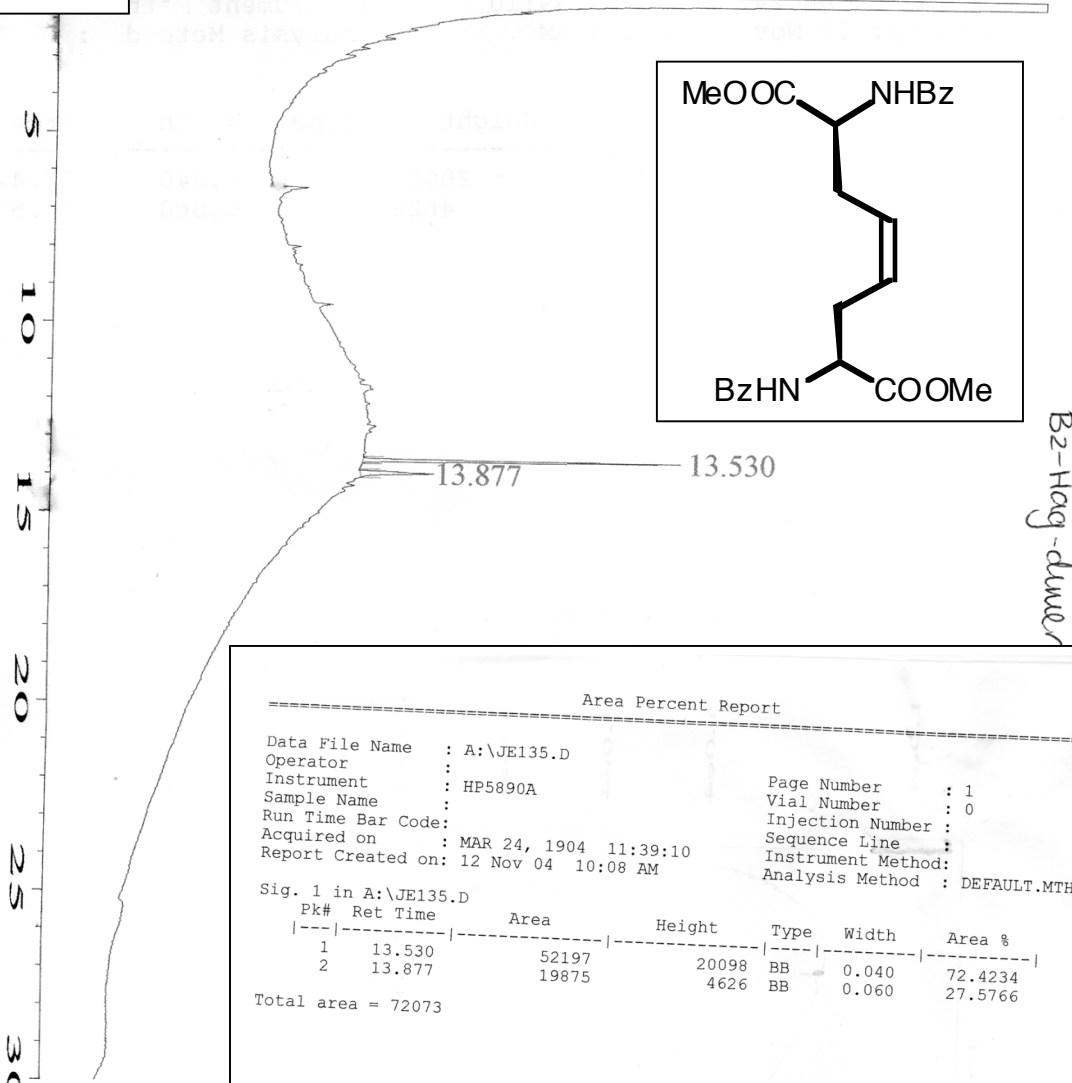

Data File Name : A:\JE135.D

Operator :

Instrument : HP5890A

Sample Name :

Run Time Bar Code:

Acquired on : MAR 24, 1904 11:39:10

Report Created on: 11 Nov 04 05:26 PM

Page Number : 1

Vial Number : 0

Injection Number :

Sequence Line :

Instrument Method:

Analysis Method : DEFAULT.MTH

**Compound 9**

reduced Ar-Hag-dimers

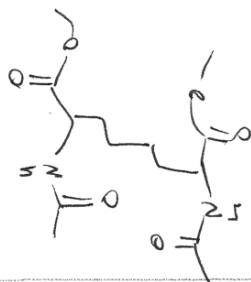

150°C 1min  
280°C (6min)  
40°C min<sup>-1</sup>

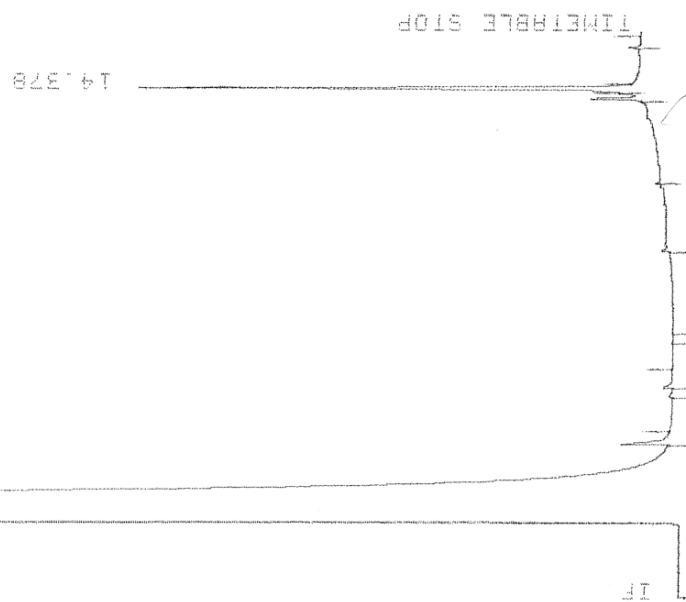

\* TIME TO STOP  
\* RUN # 70  
JUL 30, 1994 16:13:59  
START

Closing signal file H:\08060808.BNC  
RUN# 70 JUL 30, 1994 16:13:59  
SIGNAL FILE: H:\08060808.BNC  
30005/BPX-5 1.00W  
AREA%  
RT AREA TYPE WIDTH AREA%  
14.378 480725 BB .067 100.00000  
TOTAL AREA= 480725  
MULTIPLIER=1.00000E+00

## Compound 18

JE-6-155 (Bz-Hag-dimer H2'n)

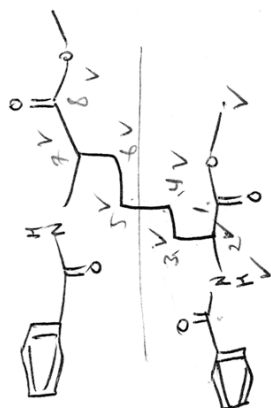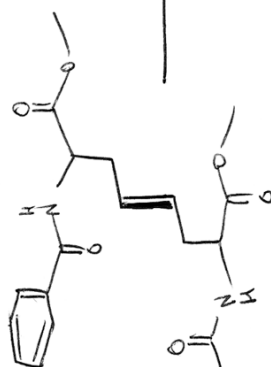from CH<sub>2</sub>  
+ catalyst

2.2

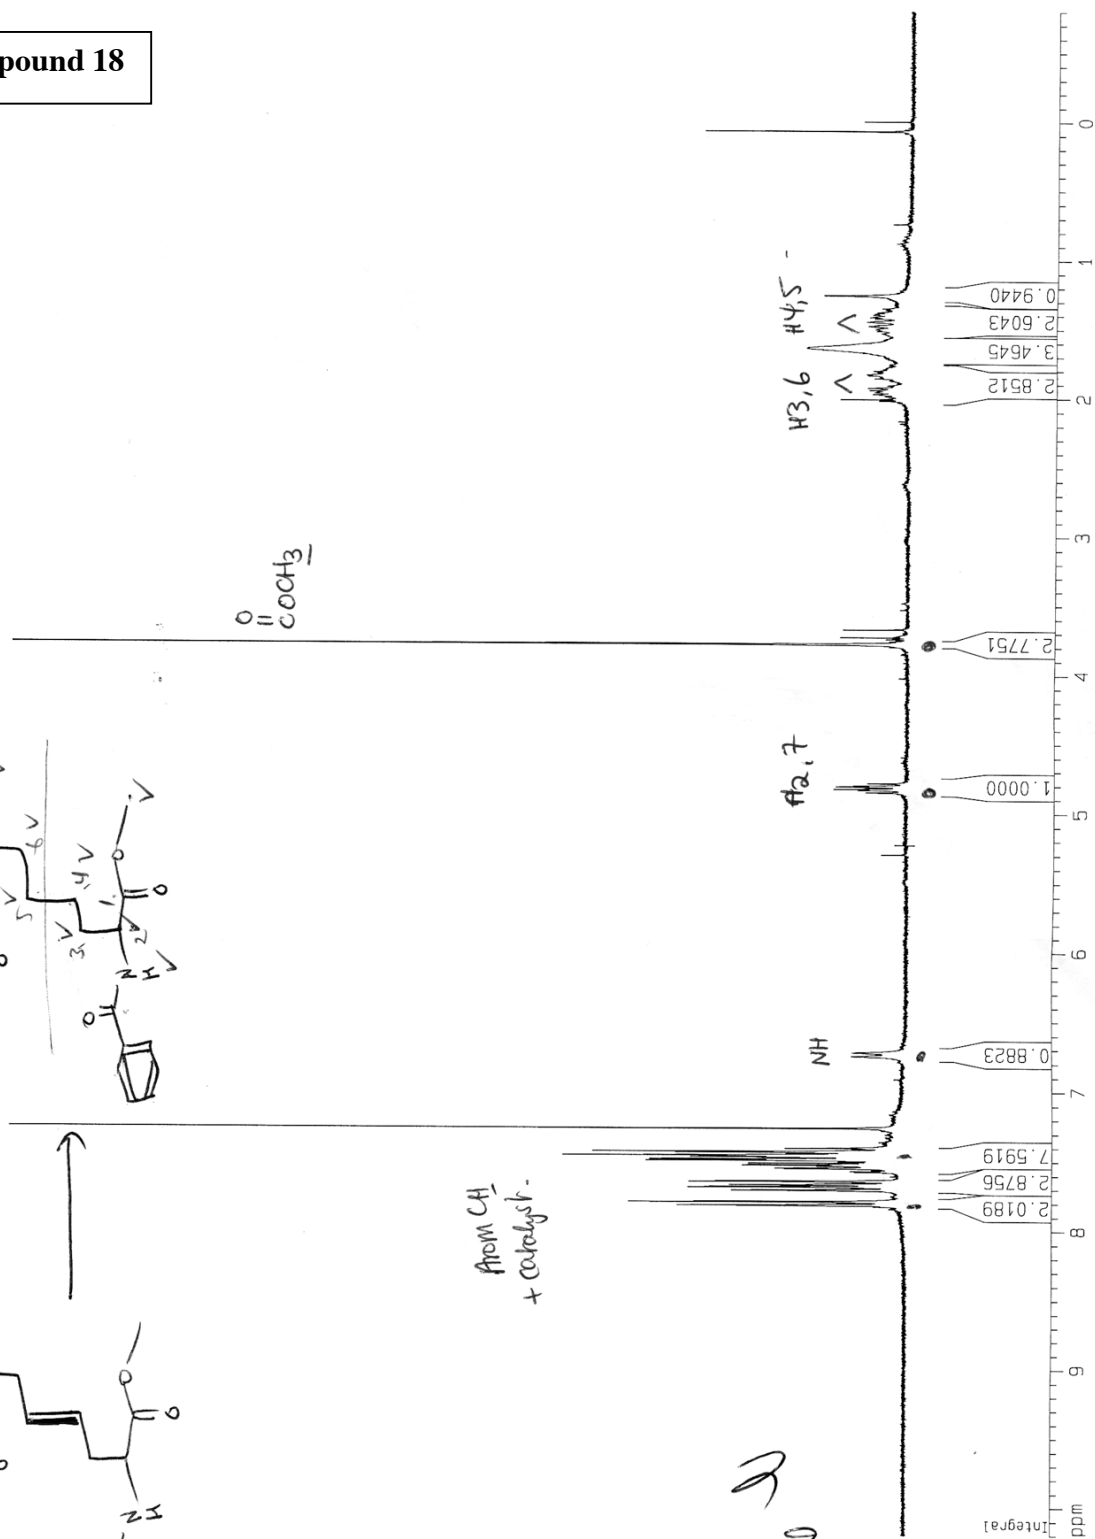

## Compound 18

TOTAL AREA= 569301  
MUL FACTOR=1.0000E+00

| RT     | AREA TYPE | WIDTH | AREA%    |
|--------|-----------|-------|----------|
| 11.042 | PB        | 1.052 | 2.66256  |
| 17.155 | PB        | 1.136 | 97.33744 |

30005/BPX-5 1.0um

SIGNAL FILE: H:\08C5E938.BNC

RUN# 67 JUL 30, 1994 13:33:43

Closing signal file H:\08C5E938.BNC

TIMEABLE STOP

11.042

11.042

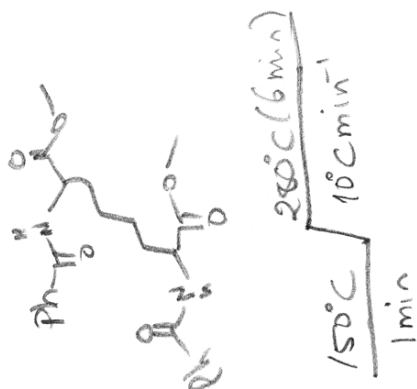

IT

IF

\* LIST: RT 2 = 5  
\* RT 2 = 3 @  
\* RUN # 67 JUL 30, 1994 13:33:43  
START

CC(=O)N[C@H](C/C=C/c1ccccc1)C(=O)OC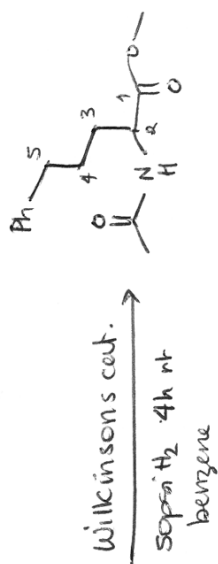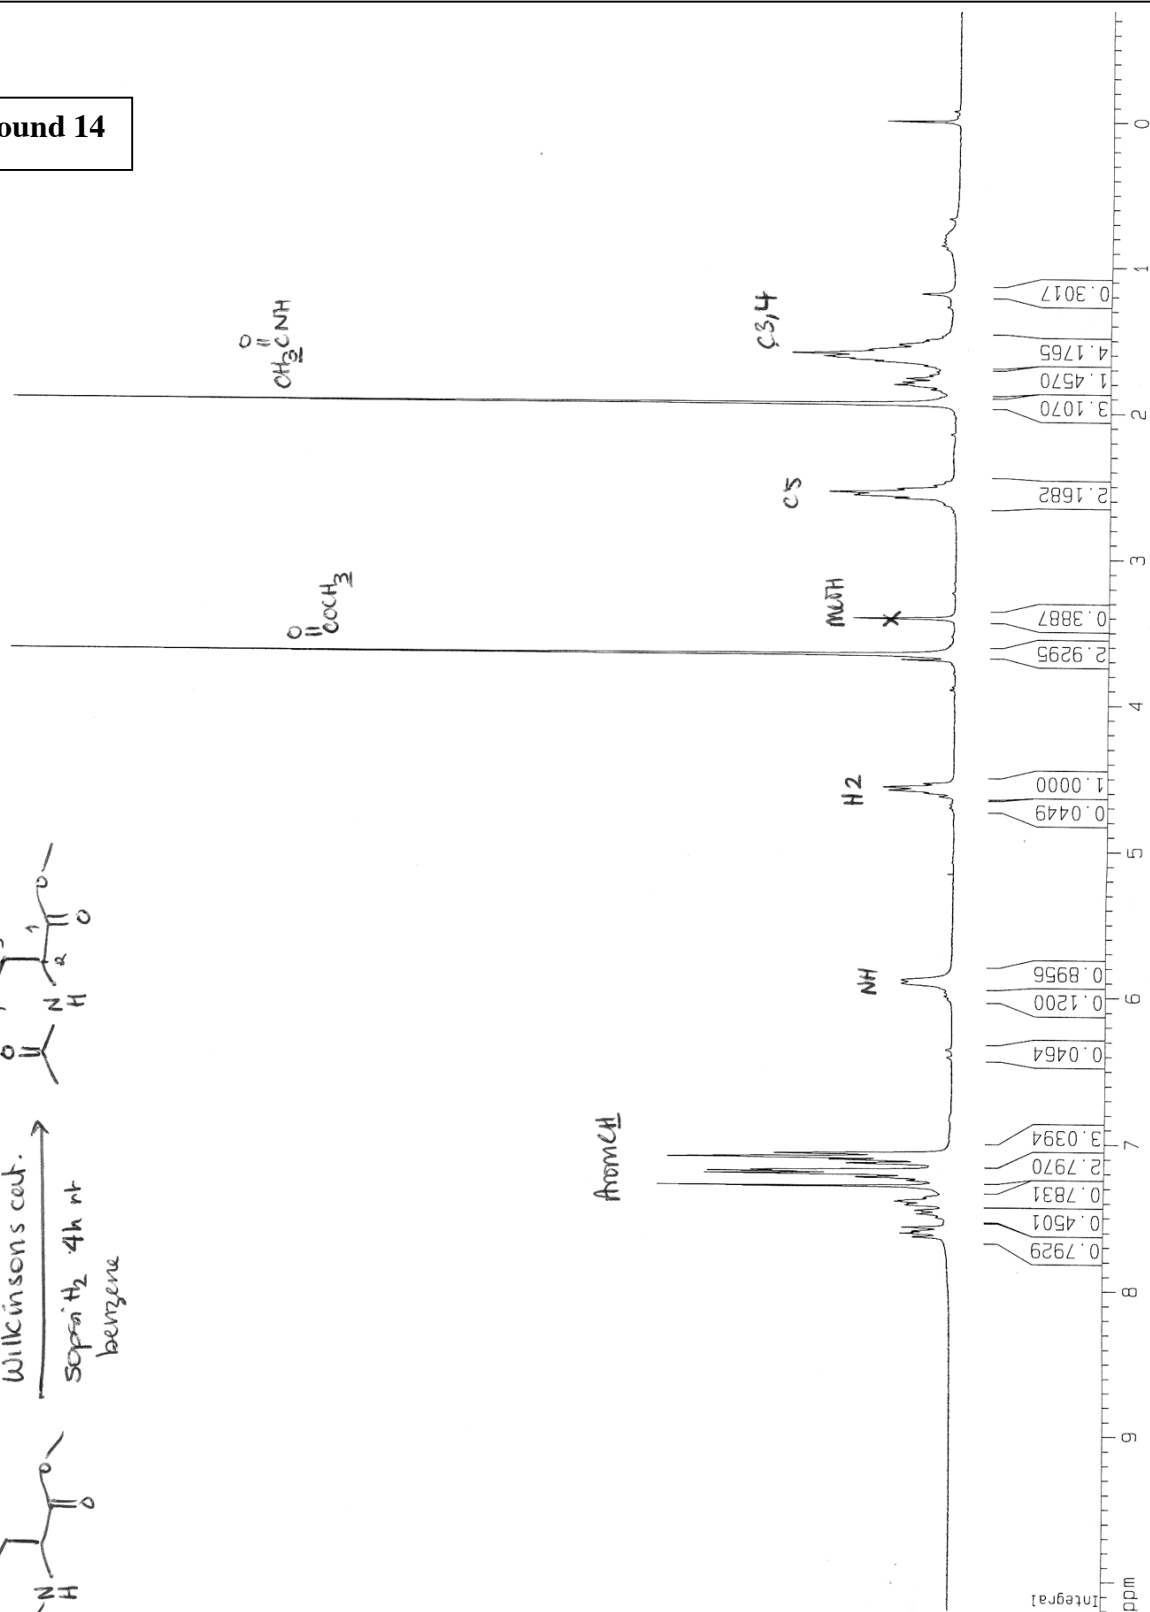

Data File Name : C:\HPCHEM\1\DATA\JE61.D  
 Operator :  
 Instrument : HP5890A  
 Sample Name :  
 Run Time Bar Code :  
 Acquired on : JUL 28, 1904 11:38:51  
 Report Created on: 12 Nov 04 10:48 AM  
 Page Number : 1  
 Vial Number : 0  
 Injection Number :  
 Sequence Line :  
 Instrument Method: LC1.MTH

**Compound 14**

| Area Percent Report               |          |                         |                   |      |         |         |
|-----------------------------------|----------|-------------------------|-------------------|------|---------|---------|
| =====                             |          |                         |                   |      |         |         |
| Data File Name                    | :        | C:\HPCHEM\1\DATA\JE61.D | Page Number       | :    | 1       |         |
| Operator                          | :        |                         | Vial Number       | :    | 0       |         |
| Instrument                        | :        | HP5890A                 | Injection Number  | :    |         |         |
| Sample Name                       | :        |                         | Sequence Line     | :    |         |         |
| Run Time Bar Code                 | :        |                         | Instrument Method | :    | LC1.MTH |         |
| Acquired on                       | :        | JUL 28, 1904 11:38:51   | Analysis Method   | :    | LC1.MTH |         |
| Report Created on:                | :        | 12 Nov 04 10:48 AM      |                   |      |         |         |
| Sig. 1 in C:\HPCHEM\1\DATA\JE61.D |          |                         |                   |      |         |         |
| Pk#                               | Ret Time | Area                    | Height            | Type | Width   | Area %  |
| 1                                 | 10.786   | 1639190                 | 545977            | BB   | 0.044   | 98.2905 |
| 2                                 | 11.271   | 28509                   | 10214             | BV   | 0.042   | 1.7095  |

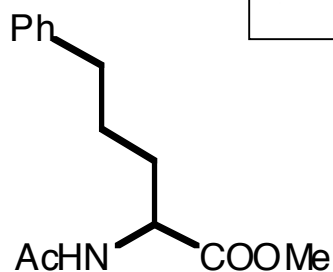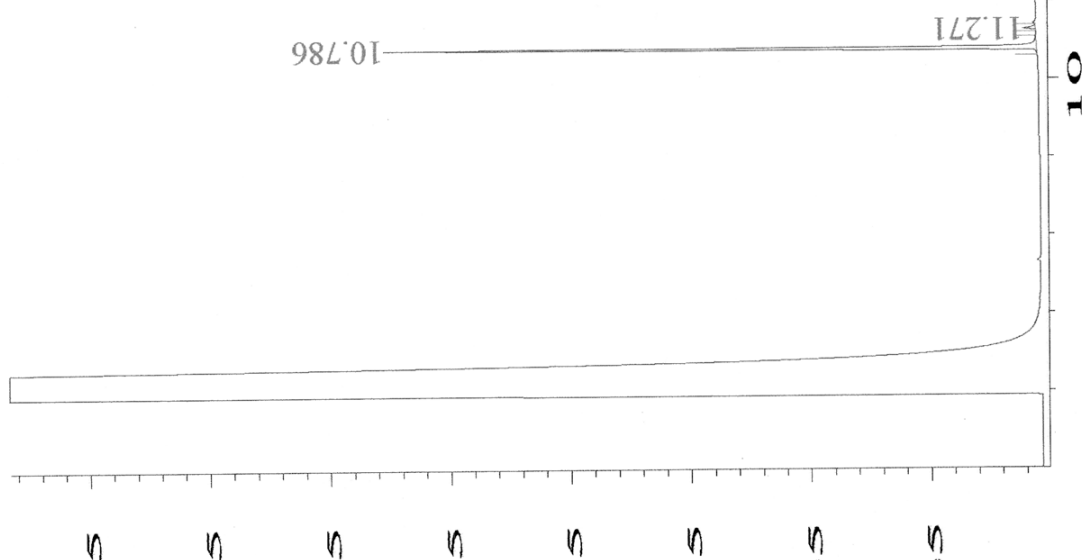

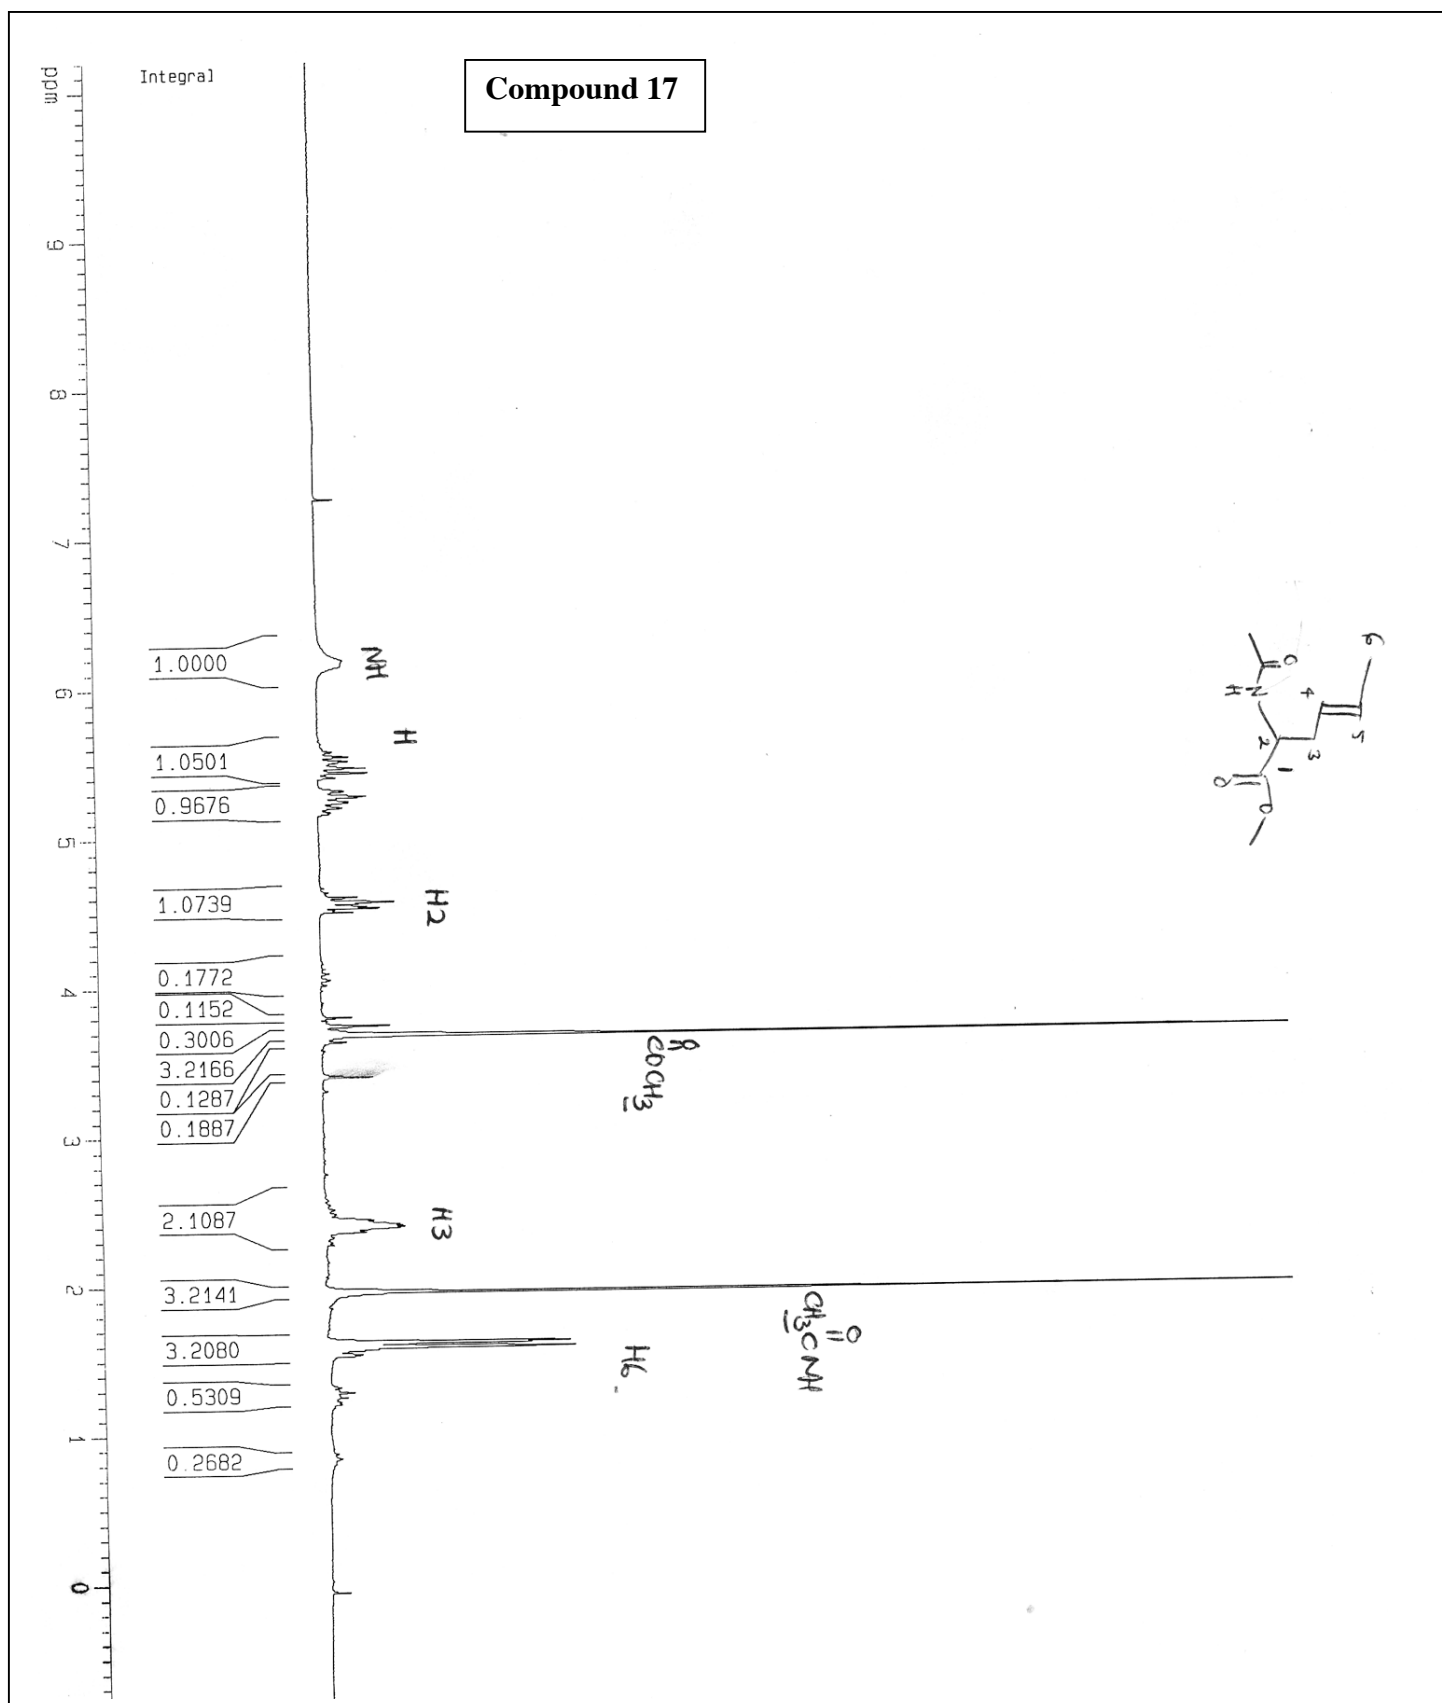



Data File Name : A:\JE17.D  
 Operator :  
 Instrument : HP5890A  
 Sample Name :  
 Run Time Bar Code :  
 Acquired on : JUN 7, 1904 09:55:28  
 Report Created on: 12 Nov 04 09:46 AM  
 Page Number : 1  
 Vial Number : 0  
 Injection Number :  
 Sequence Line :  
 Instrument Method :  
 Analysis Method : LCI.MTH

# Compound 17

Area Percent Report

| Data File Name : A:\JE17.D            |          |         |         |      |
|---------------------------------------|----------|---------|---------|------|
| Operator :                            |          |         |         |      |
| Instrument : HP5890A                  |          |         |         |      |
| Sample Name :                         |          |         |         |      |
| Run Time Bar Code :                   |          |         |         |      |
| Acquired on : JUN 7, 1904 09:55:28    |          |         |         |      |
| Report Created on: 12 Nov 04 09:46 AM |          |         |         |      |
| Analysis Method : LCI.MTH             |          |         |         |      |
| Page Number                           | : 1      |         |         |      |
| Vial Number                           | : 0      |         |         |      |
| Injection Number                      | :        |         |         |      |
| Sequence Line                         | :        |         |         |      |
| Instrument Method                     | :        |         |         |      |
| Total area = 2585052                  |          |         |         |      |
| PK#                                   | Ret Time | Area    | Height  | Type |
| 1                                     | 4.164    | 2286028 | 585623  | BV   |
| 2                                     | 4.356    | 299024  | 59439   | VB   |
|                                       |          |         | 0.068   |      |
|                                       |          |         | 0.060   |      |
|                                       |          |         | 88.4326 |      |
|                                       |          |         | 11.5674 |      |

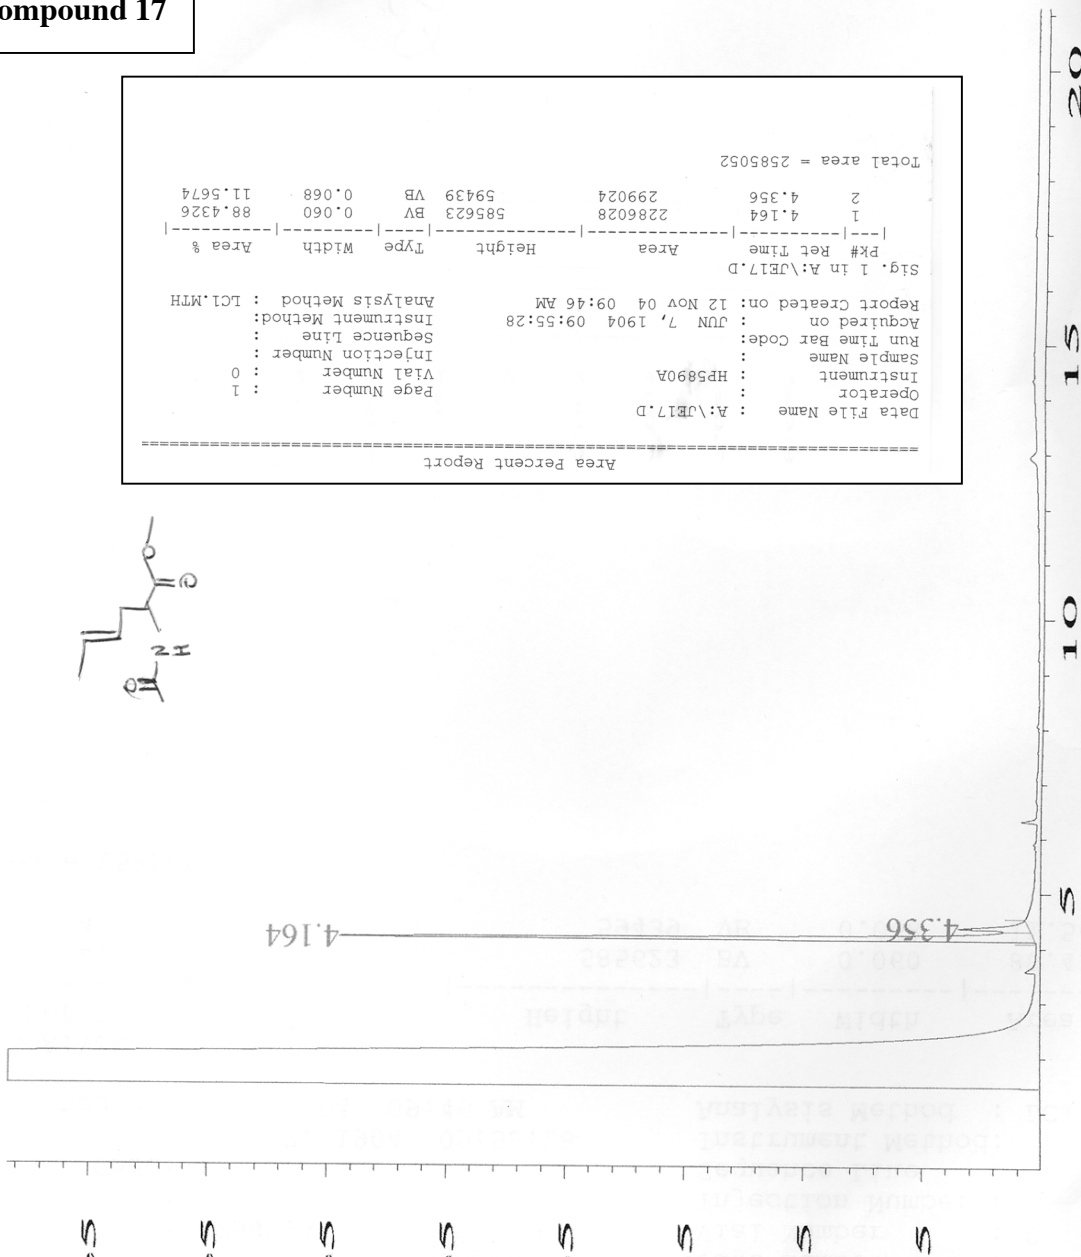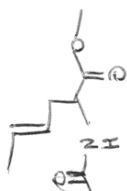

S23
